# Supplementary material
Source: PubMed Central journal article supplement (PMC6508752)
Supplement: am9b02649_si_001.pdf [file am9b02649_si_001.pdf]

# Supporting Information

## **Bio-based Cellulose Nanofibril-Oil Composite Films for Active edible Barriers**

*Luis Valencia*<sup>1\*‡</sup>, *Emma M. Nomena*<sup>2,3\*‡</sup>, *Aji P. Mathew*<sup>1</sup> and *Krassimir P. Velikov*<sup>2,3,4</sup>

<sup>1</sup>Division of Materials and Environmental Chemistry, Stockholm University, Frescativägen 8, 10691, Stockholm, Sweden

<sup>2</sup>Unilever R&D Vlaardingen, Olivier van Nortlaan 120, 3133 AT, Vlaardingen, The Netherlands

<sup>3</sup>Institute of Physics, University of Amsterdam, Science Park 904, 1098 XH Amsterdam, the Netherlands

<sup>4</sup>Soft Condensed Matter, Debye Institute for Nanomaterials Science, Utrecht University, Princetonplein 5, 3584 CC Utrecht, the Netherlands

E-mail: [luis.alexandro@mmk.su.se](mailto:luis.alexandro@mmk.su.se); [krassimir.velikov@unilever.com](mailto:krassimir.velikov@unilever.com)

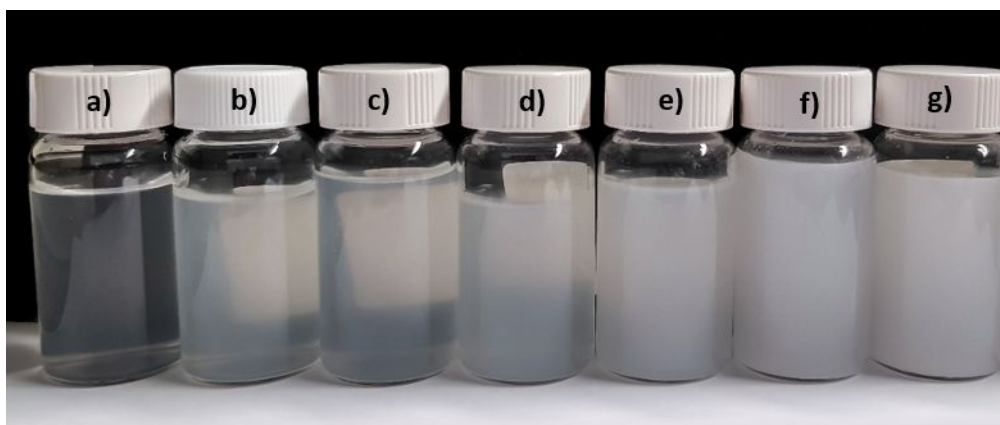

Figure S1. Photographs of CNF-stabilized Pickering emulsions with different oil concentrations a) Reference (CNF, 0.05wt%); b) 0.01wt% oil; c) 0.016 wt% oil; d) 0.025 wt% oil; e) 0.05 wt% oil; f) 0.24 wt% oil and g) 0.33 wt% oil. All emulsions contain 0.05wt% CNF.

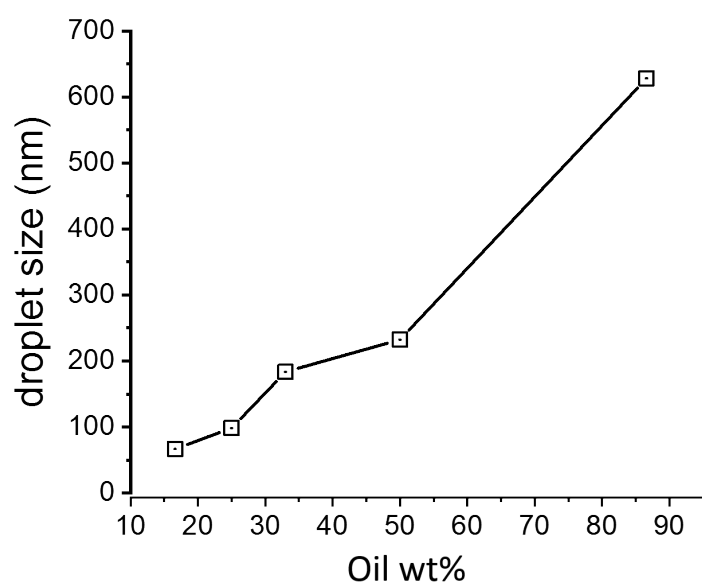

Figure S2. Droplet size as function of oil content in CNF-stabilized Pickering emulsions.

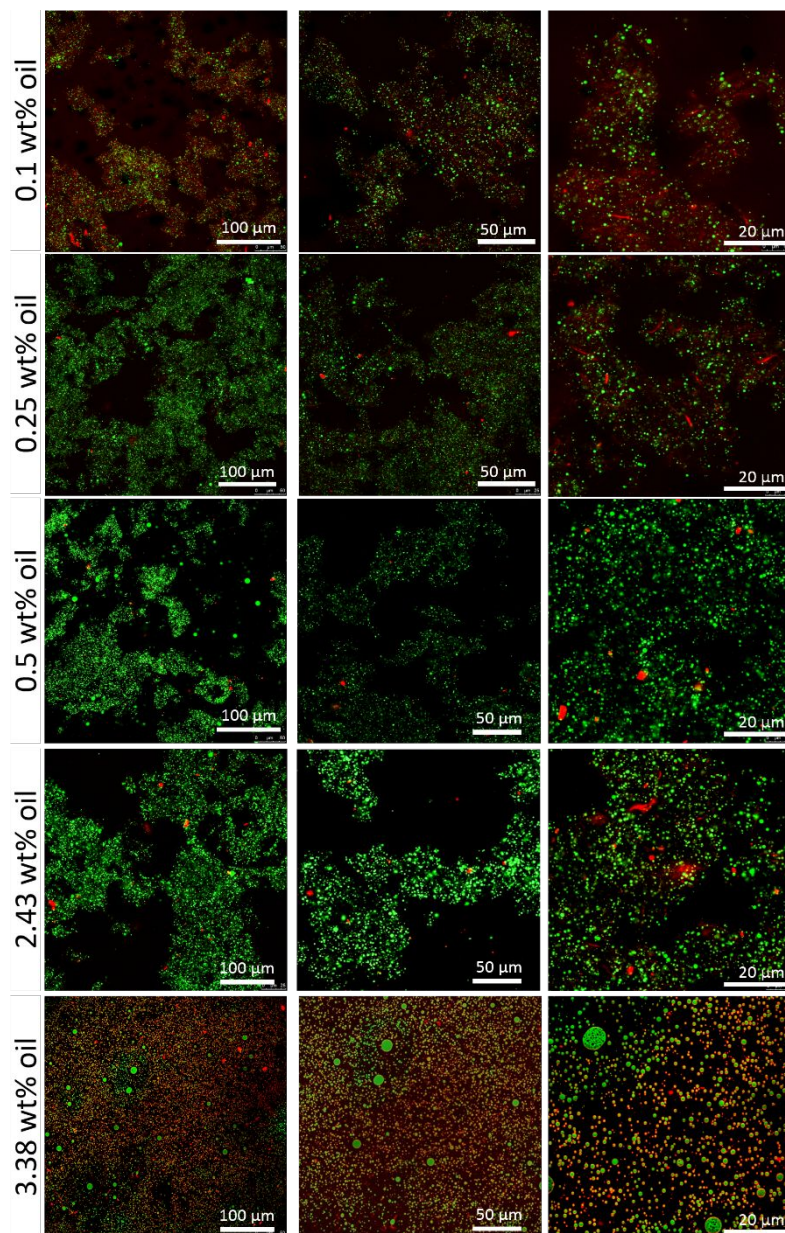

Figure S3. Confocal microscopy image of CNF-stabilized Pickering emulsions. All emulsions contain 0.5 wt% CNF.

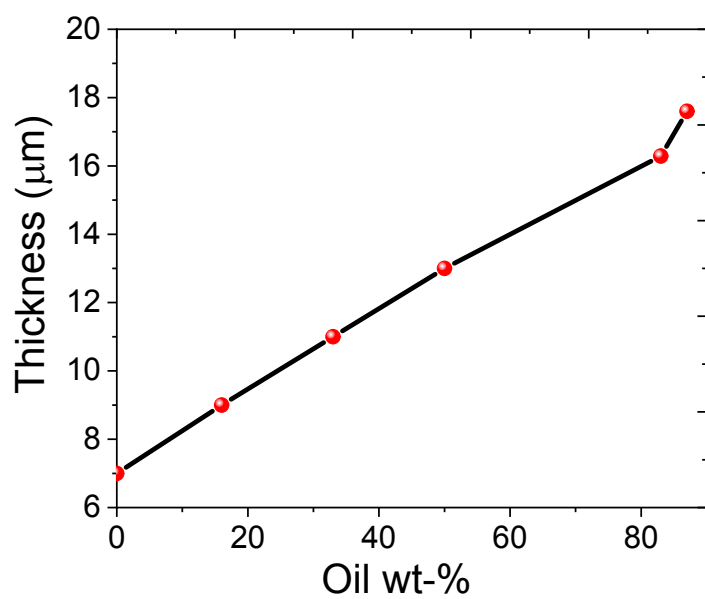

Figure S4. Measured thickness of composite films as a function of oil content.

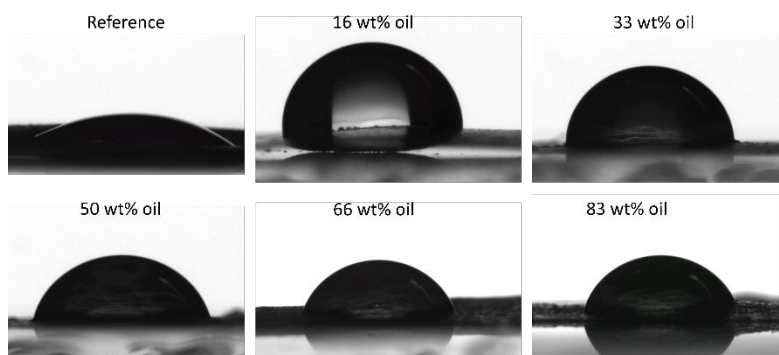

Figure S5. Contact angle measurement of composite films with different oil loadings (taken after 2 seconds after droplet deposition).

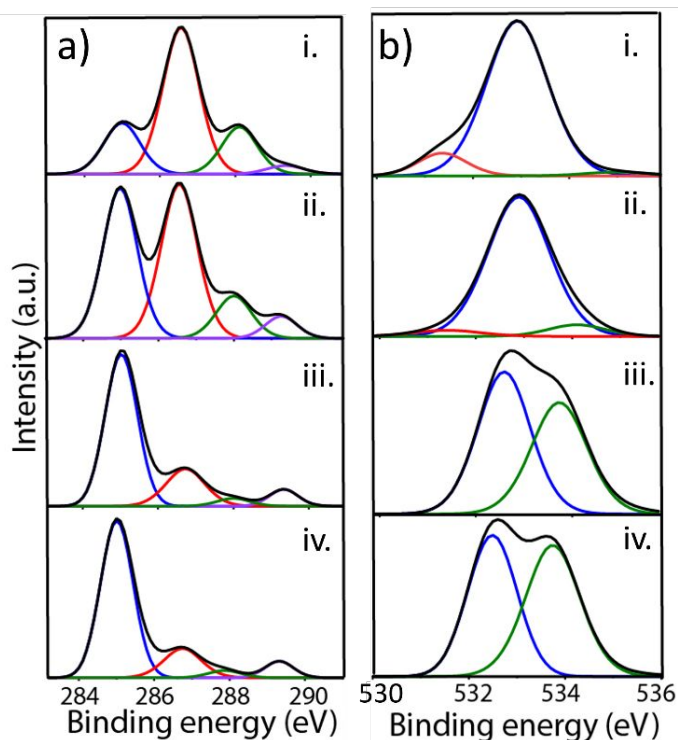

Figure S6. XPS spectra of composite films. a) High-resolution C1s spectra and b) high-resolution O1s spectra: i. Reference; ii. 16 wt% oil; iii. 50 wt% oil and iv. 83 wt% oil.

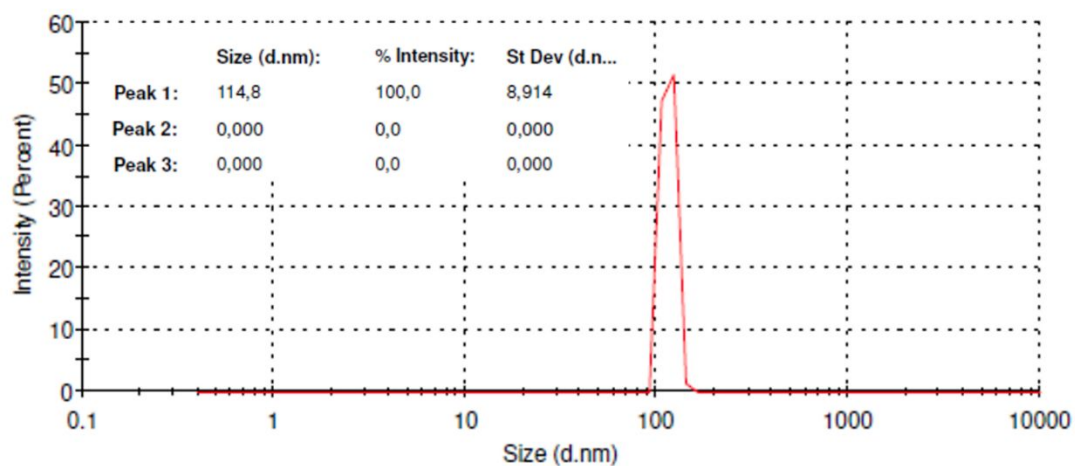

Figure S7. Oil size distribution determined by Dynamic light scattering of emulsion with 0.016 wt% oil content before preparing composite film (0.05 wt% of CNF).

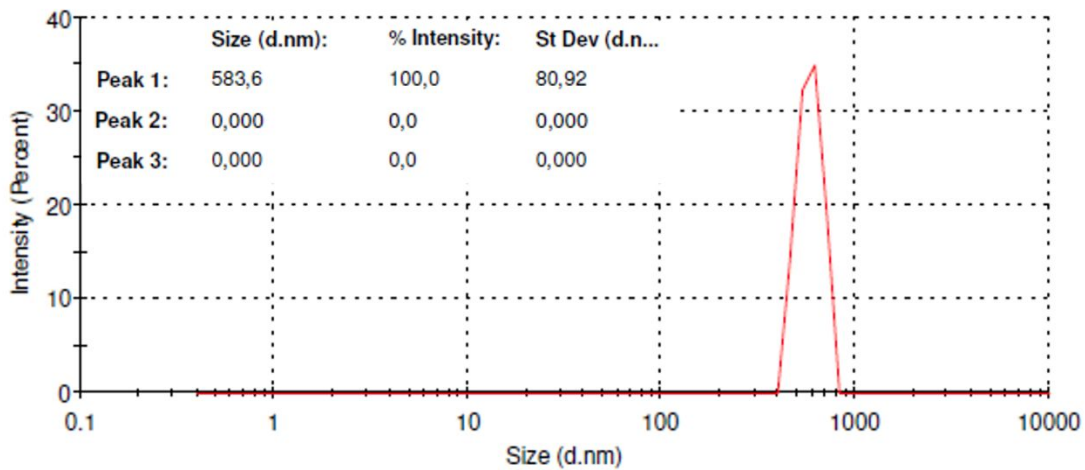

Figure S8. Droplet size distribution of emulsion obtained after redispersion of composite film as determined by dynamic light scattering. The film was prepared using emulsion with 0.16 wt% oil and 0.5 wt% CNFs.

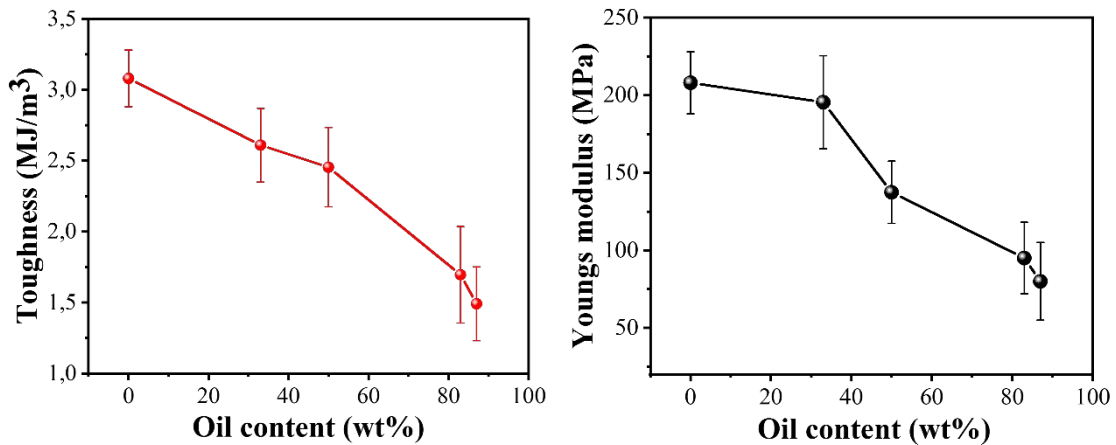

Figure S9. Toughness and Young's modulus of the composite films as a function of oil content.

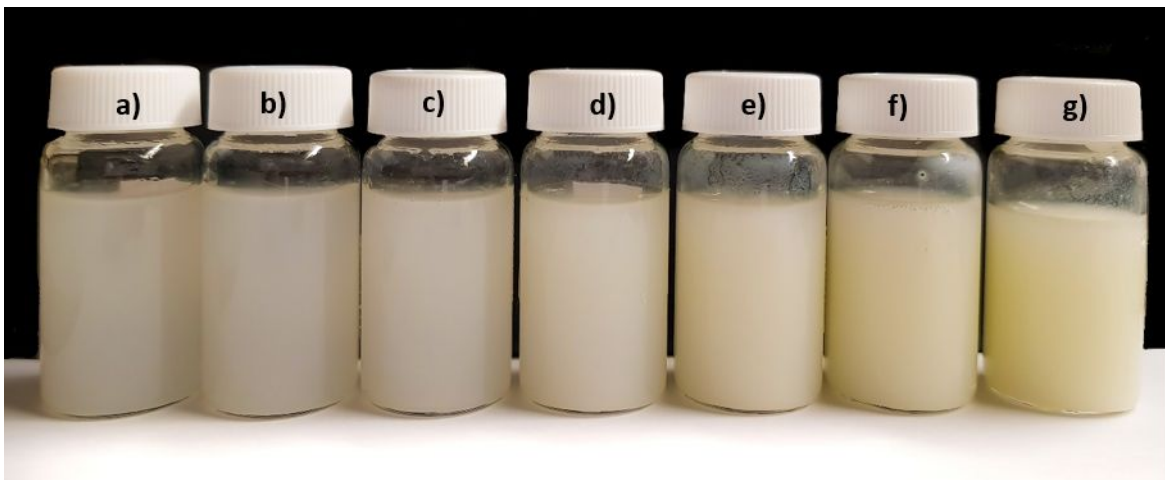

Figure S10. Photographs of CNF-stabilized Pickering emulsions with different oil concentrations loaded with curcumin ( $5.5 \times 10^{-6}$  wt% in oil phase): a) 0.1 wt% oil; b) 0.0166

wt% oil; c) 0.025 wt% oil; d) 0.05 wt% oil; e) 0.1 wt% oil; f) 0.24 wt% oil and g) 0.34 wt% oil. All emulsions contain 0.05 wt% CNFs.

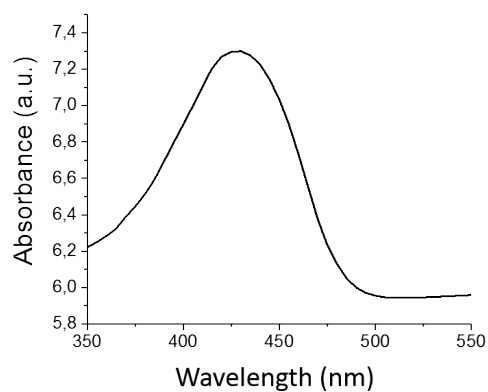

Figure S11. UV-VIS spectra of soybean oil loaded with curcumin ( $5.5 \times 10^{-6}$  wt%).

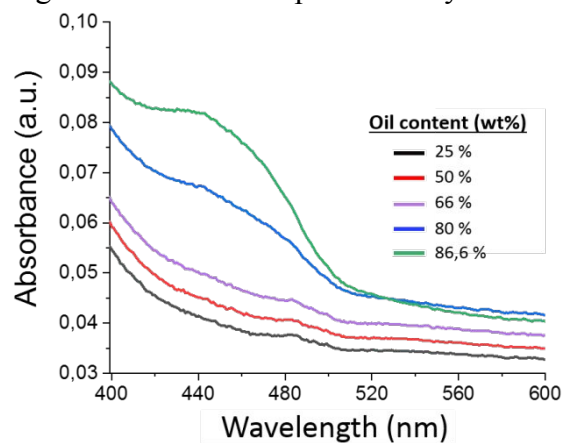

Figure S12. UV-vis spectra of composite films loaded with curcumin.

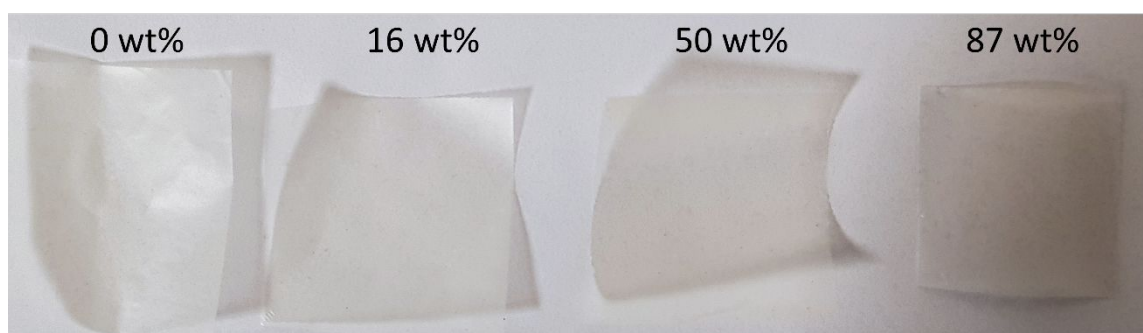

Figure S13. Photograph of composite films with different oil concentrations.

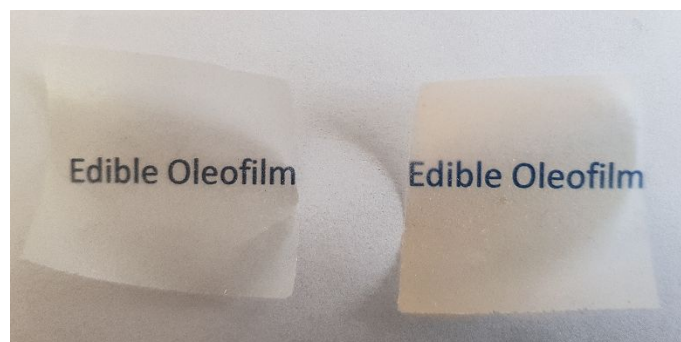

Figure S14. Photograph of a film loaded with curcumin (right side) proving the homogenous distribution of the bioactive compound
